# Supplementary material for: Computational design of high efficiency nonplanar tri-s-triazine-based ambipolar host materials for phosphorescent blue emitters
Source: Royal Society of Chemistry journal article supplement (doi:10.1039/c6cp06230j), 2016-01-01
Supplement: c6cp06230j1.pdf [file c6cp06230j1.pdf]

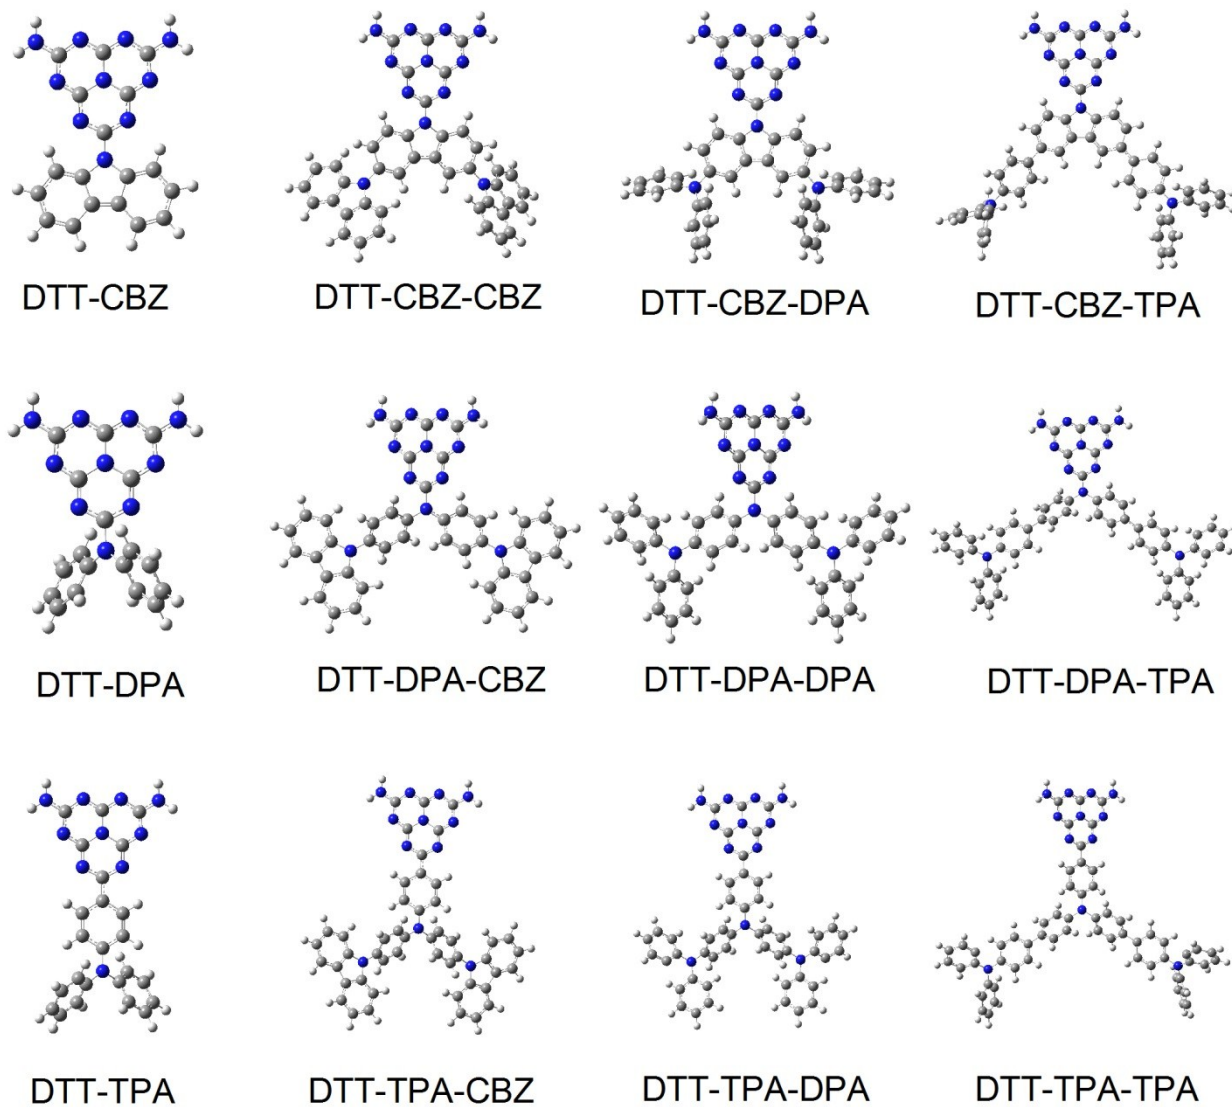

Figure S11 The optimized structures of primary designed host molecules in ground states ( $S_0$ ) at B3LYP/6-31G\* level of theory

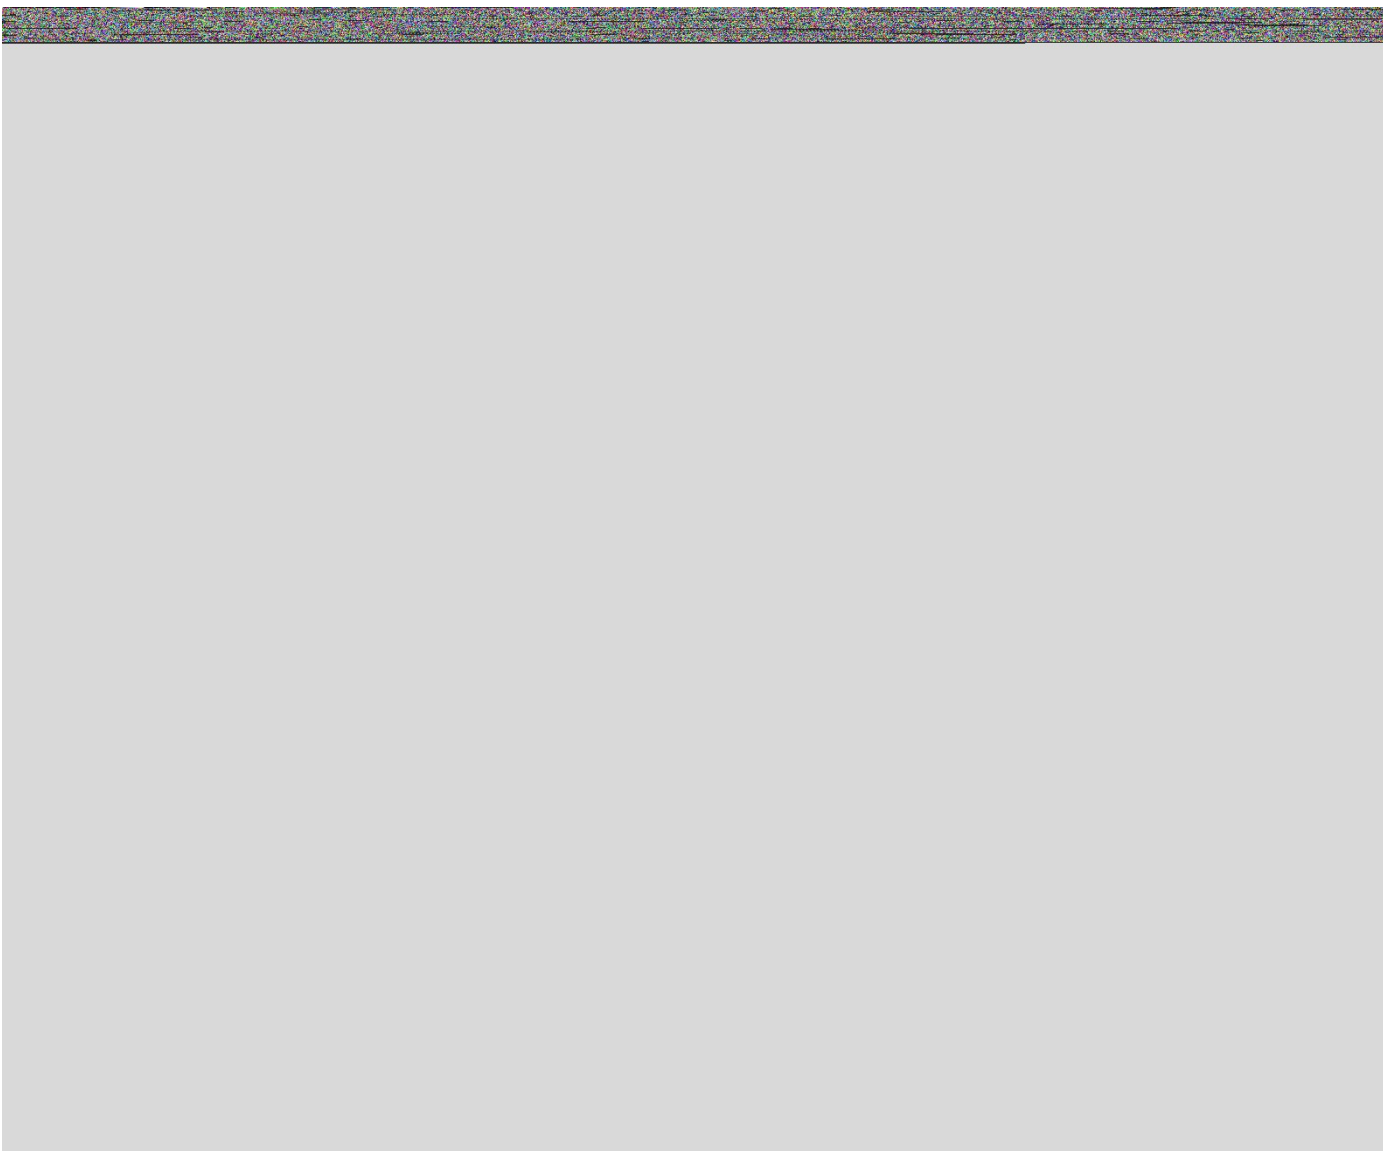

Figure SI2 The optimized structures of primary designed host molecules in excited state ( $T_1$ ) at B3LYP/6-31G\* level of theory

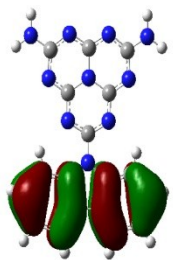

DTT-CBZ

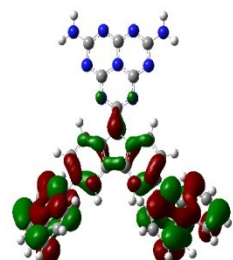

DTT-CBZ-CBZ

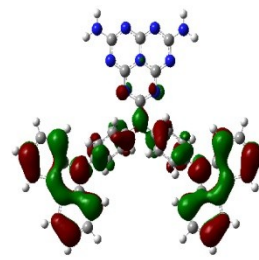

DTT-CBZ-DPA

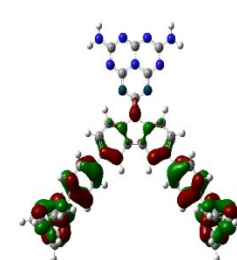

DTT-CBZ-TPA

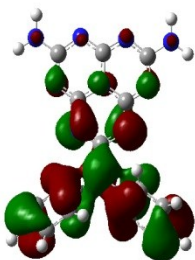

DTT-DPA

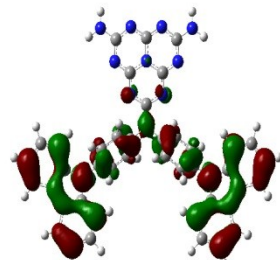

DTT-DPA-CBZ

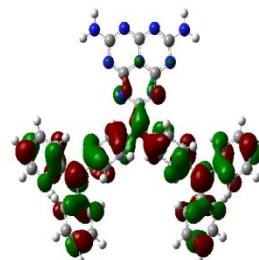

DTT-DPA-DPA

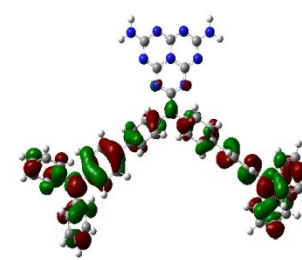

DTT-DPA-TPA

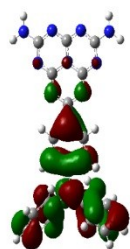

DTT-TPA

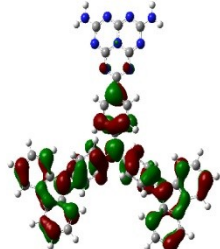

DTT-TPA-CBZ

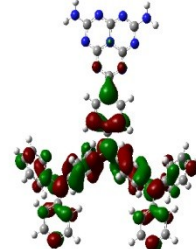

DTT-TPA-DPA

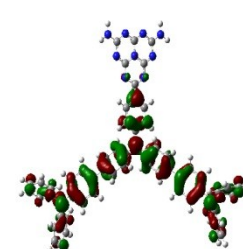

DTT-TPA-TPA

HOMO

Figure S13 The spatial distribution of frontier molecular orbitals(HOMO) for primary designed host molecules

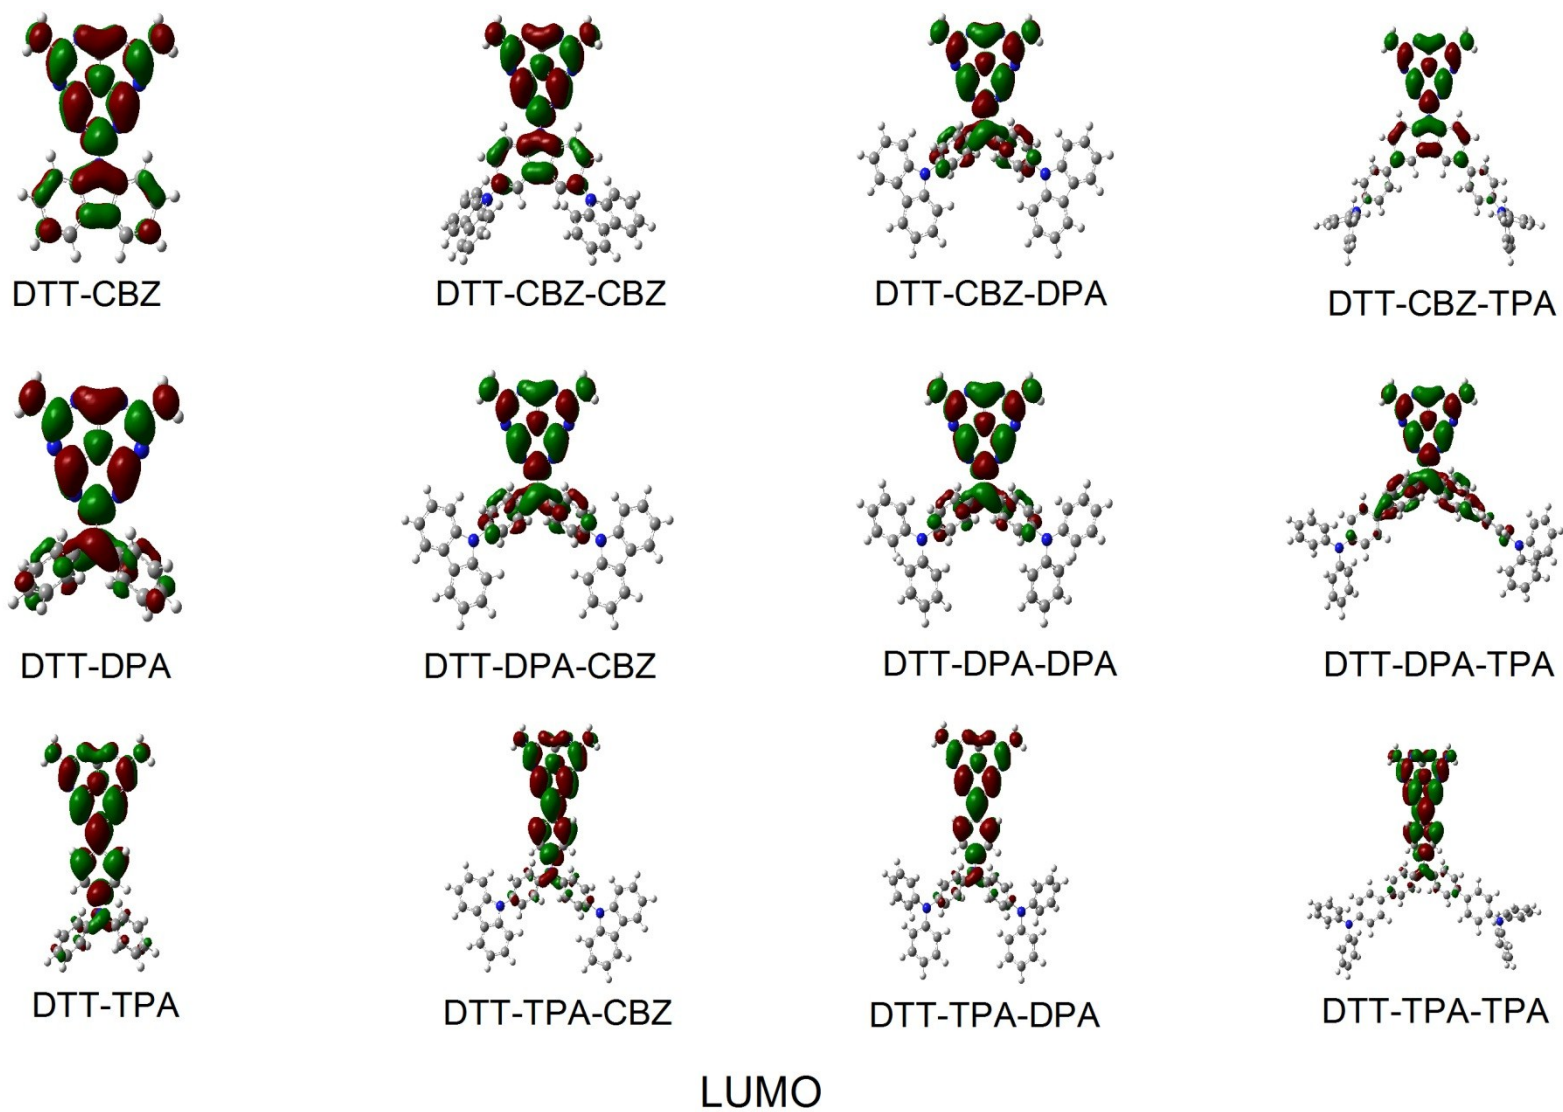

Figure SI4 The spatial distribution of frontier molecular orbitals(LUMO) for primary designed host molecules

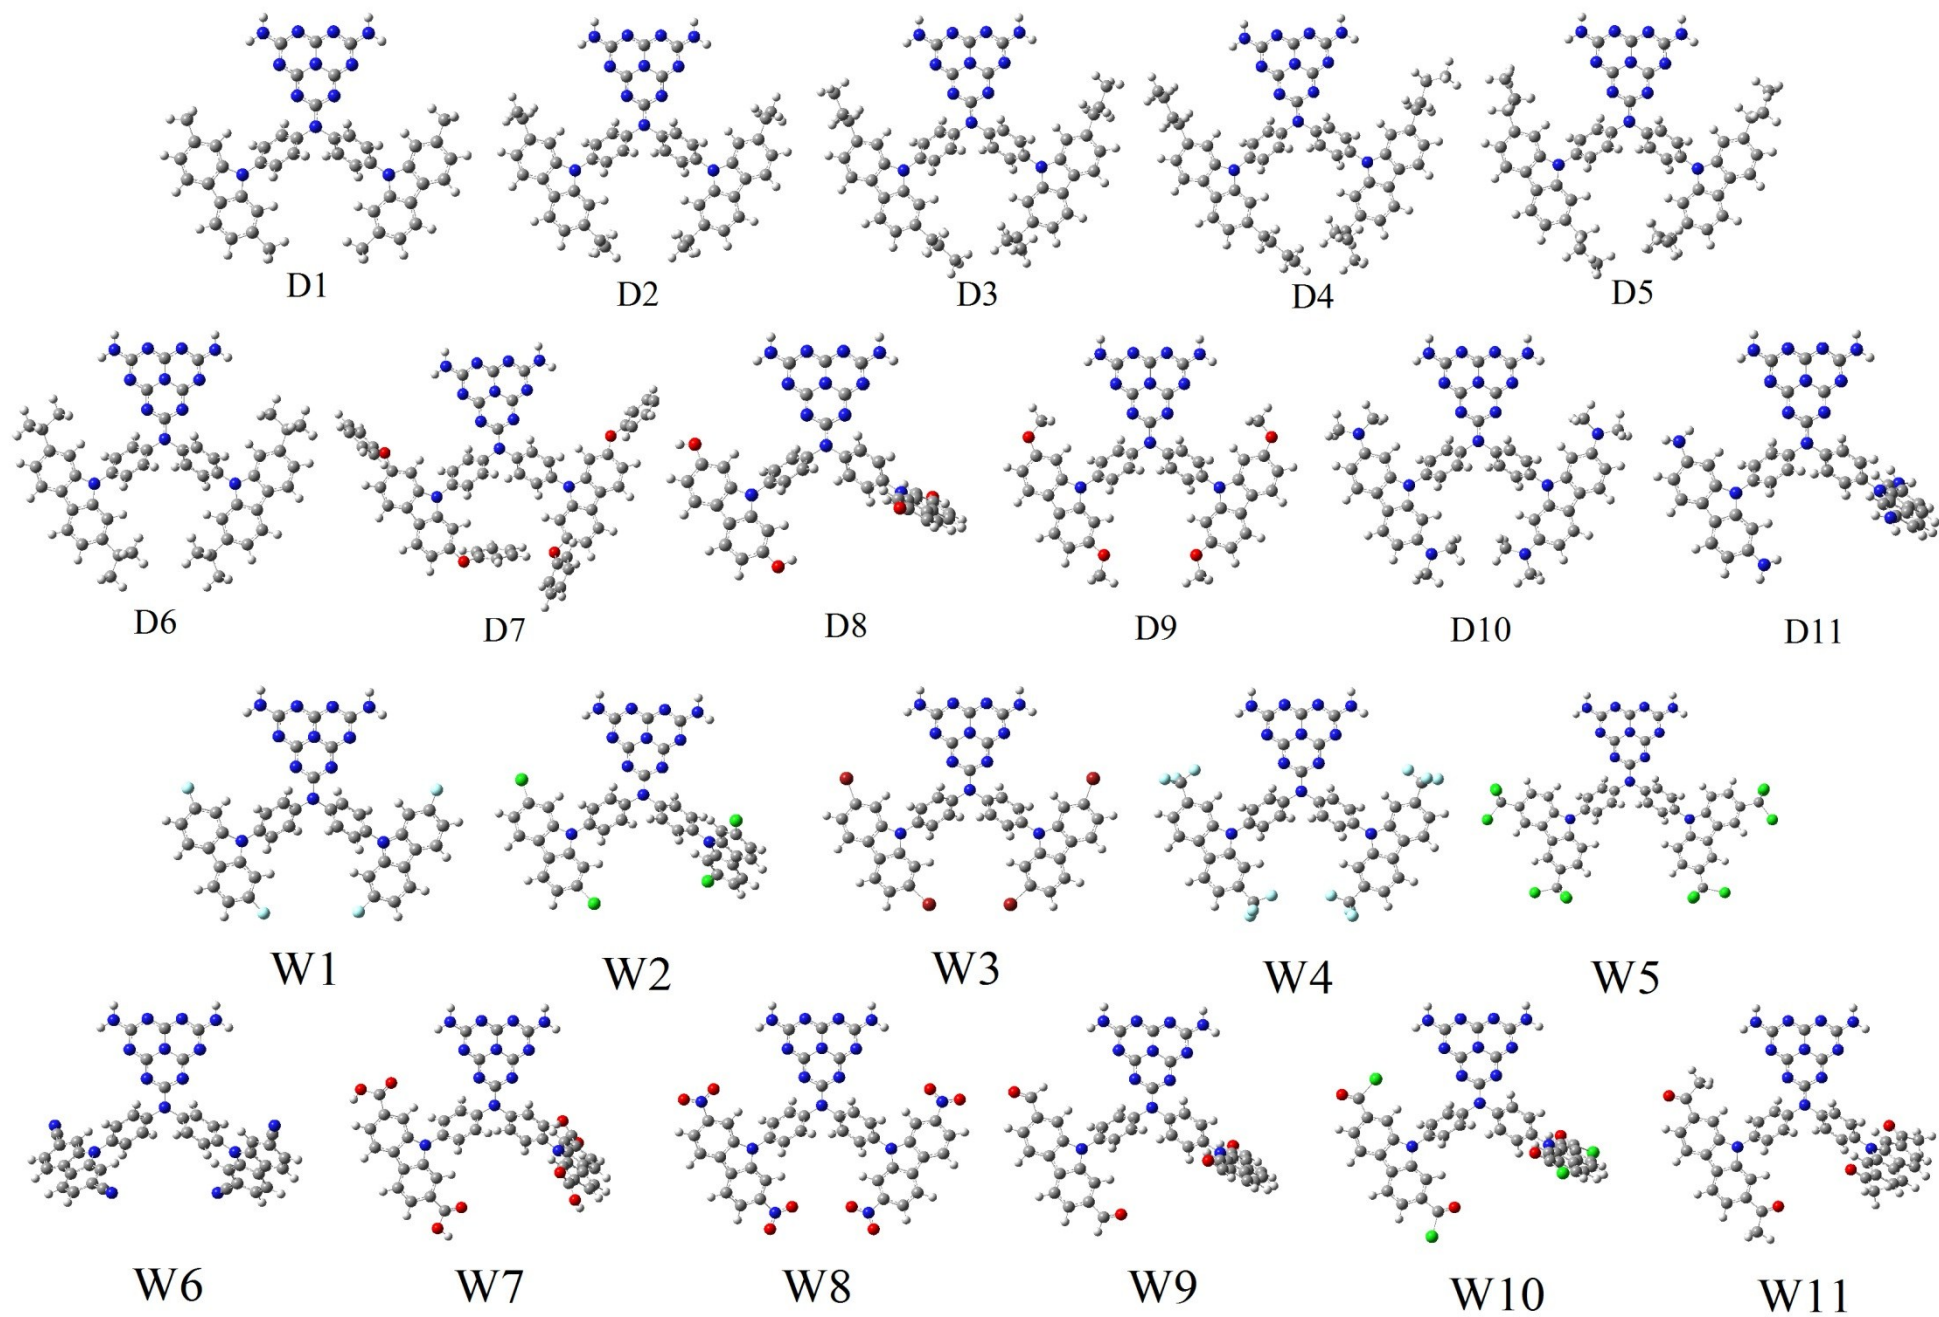

Figure S15 The optimized structures of EDG and EWG substituted DTT-DPA-CBZ in ground states ( $S_0$ ) at B3LYP/6-31G\* level of theory

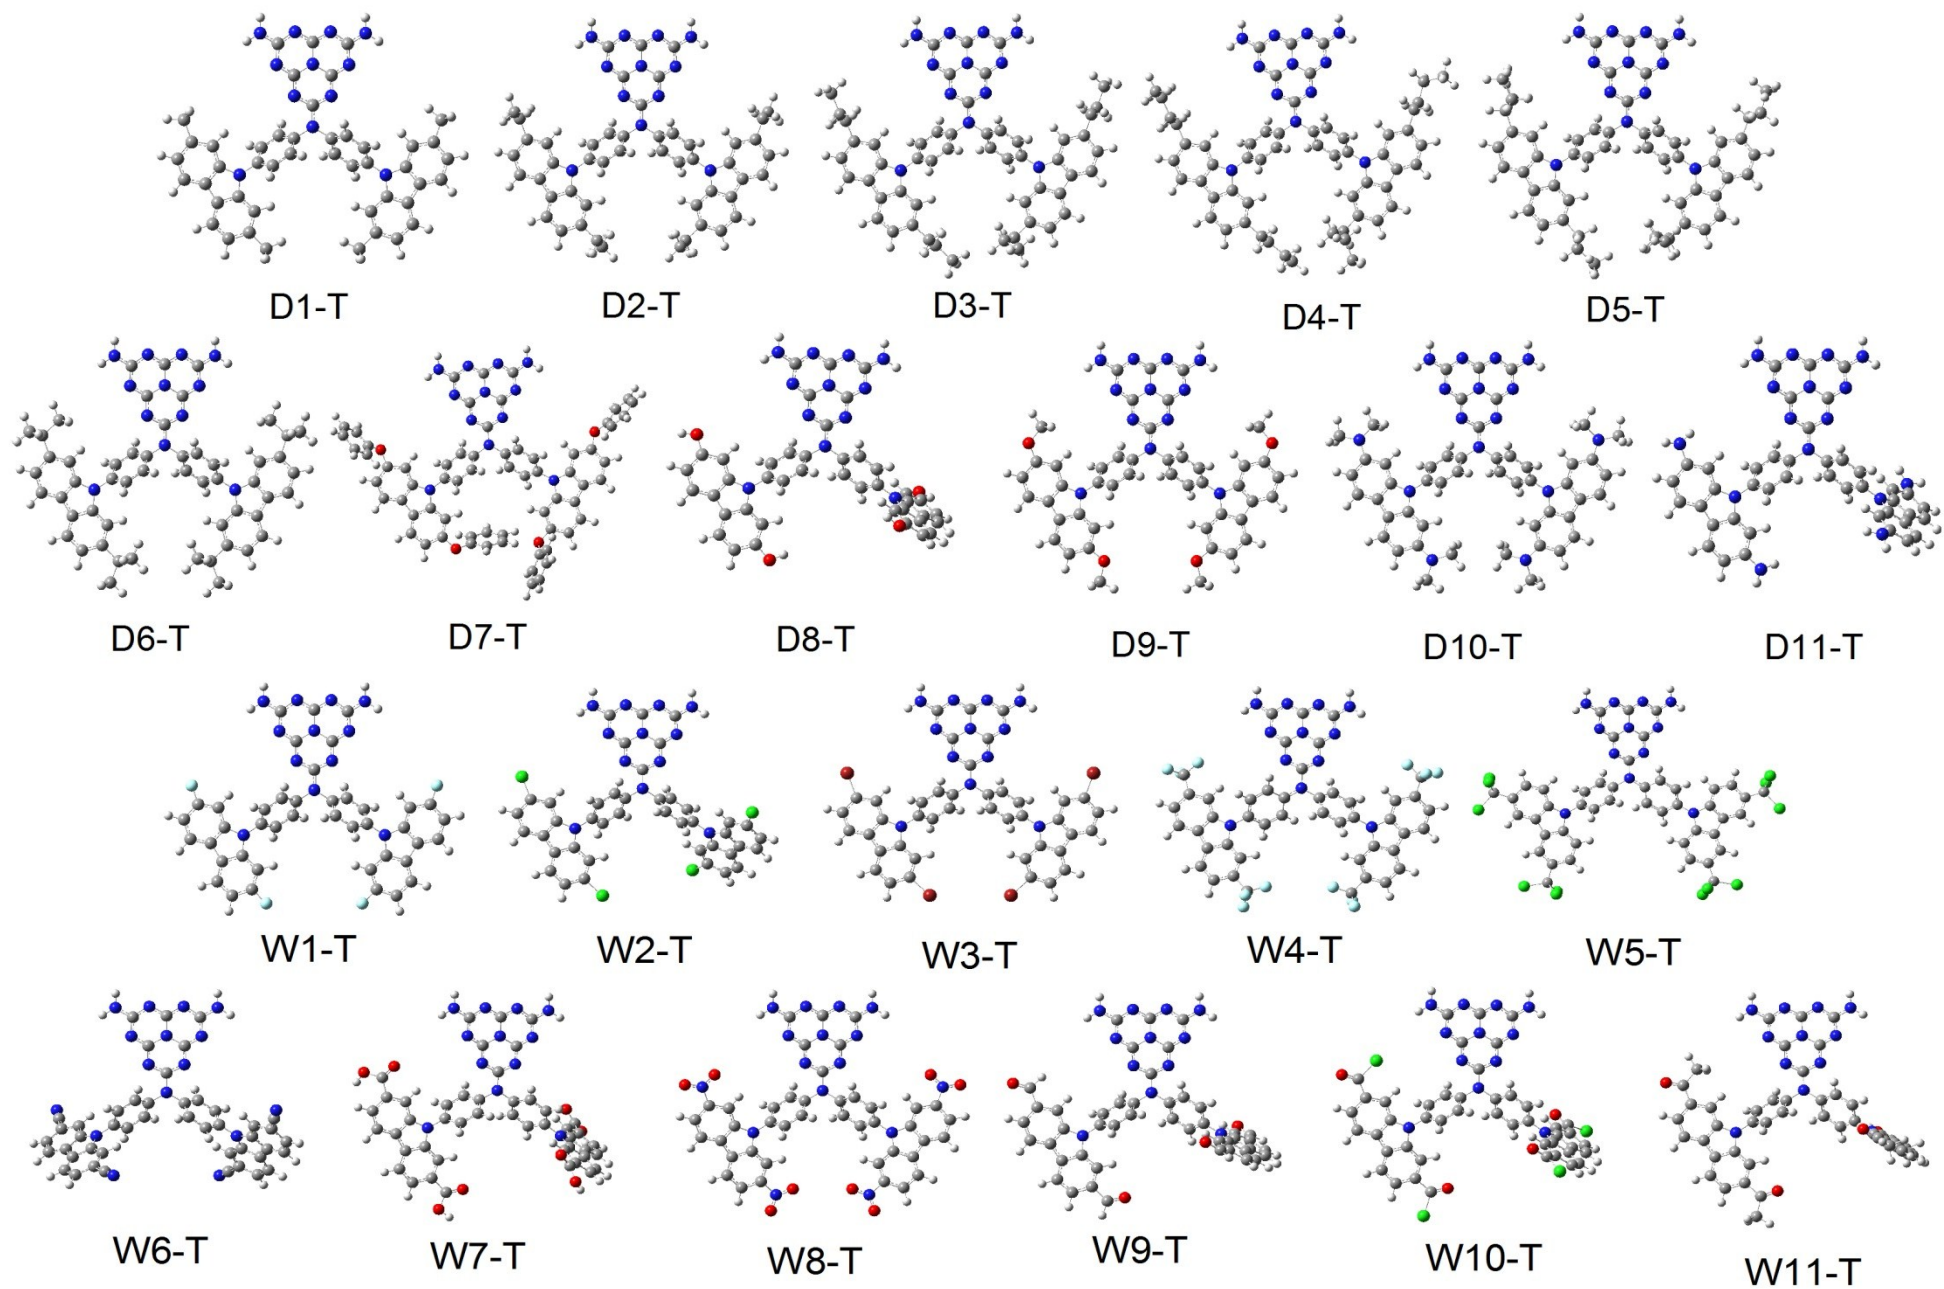

Figure SI6 The optimized structures of EDG and EWG substituted DTT-DPA-CBZ in excited states ( $T_1$ ) at B3LYP/6-31G\* level of theory

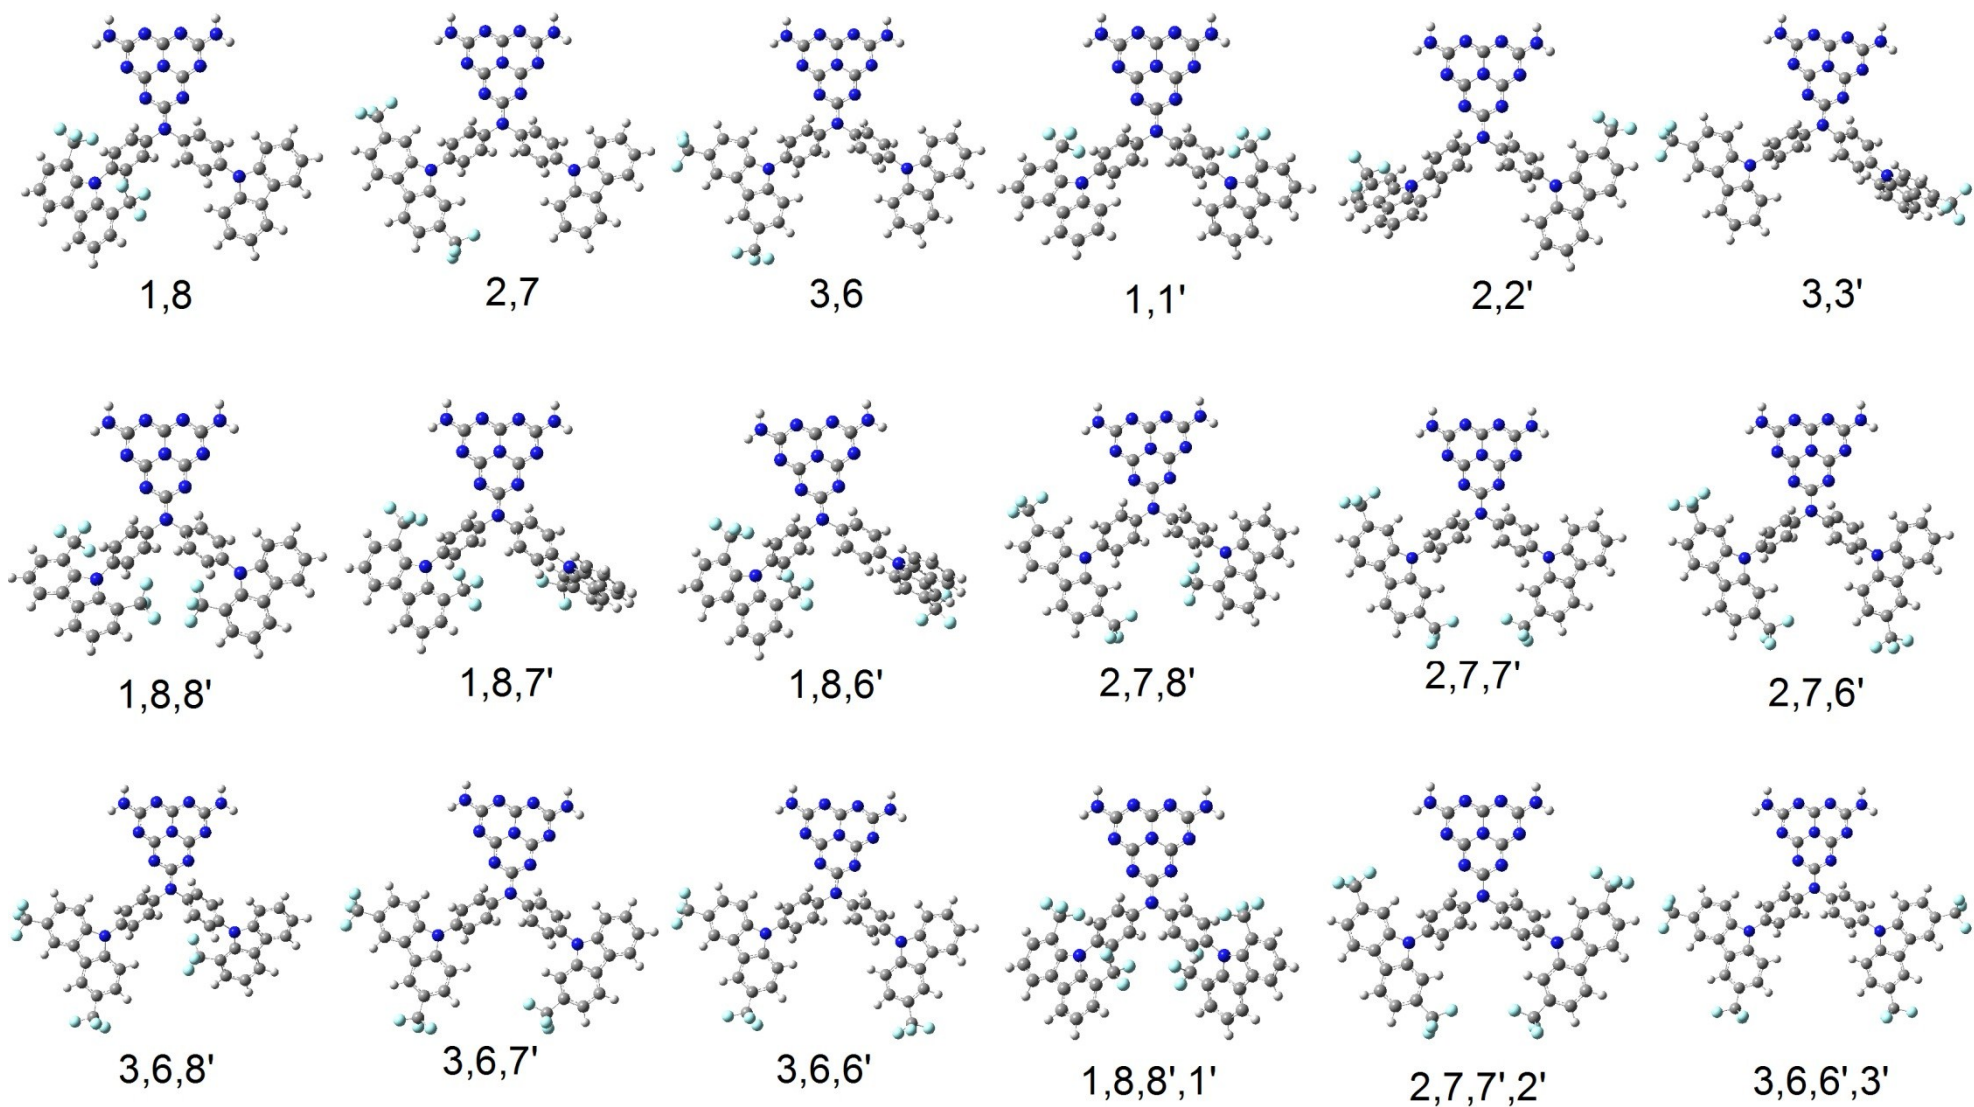

Figure SI7 The optimized structures for the trifluoromethyl substituted DTT-DPA-CBZ in ground states ( $S_0$ ) at B3LYP/6-31G\* level of theory

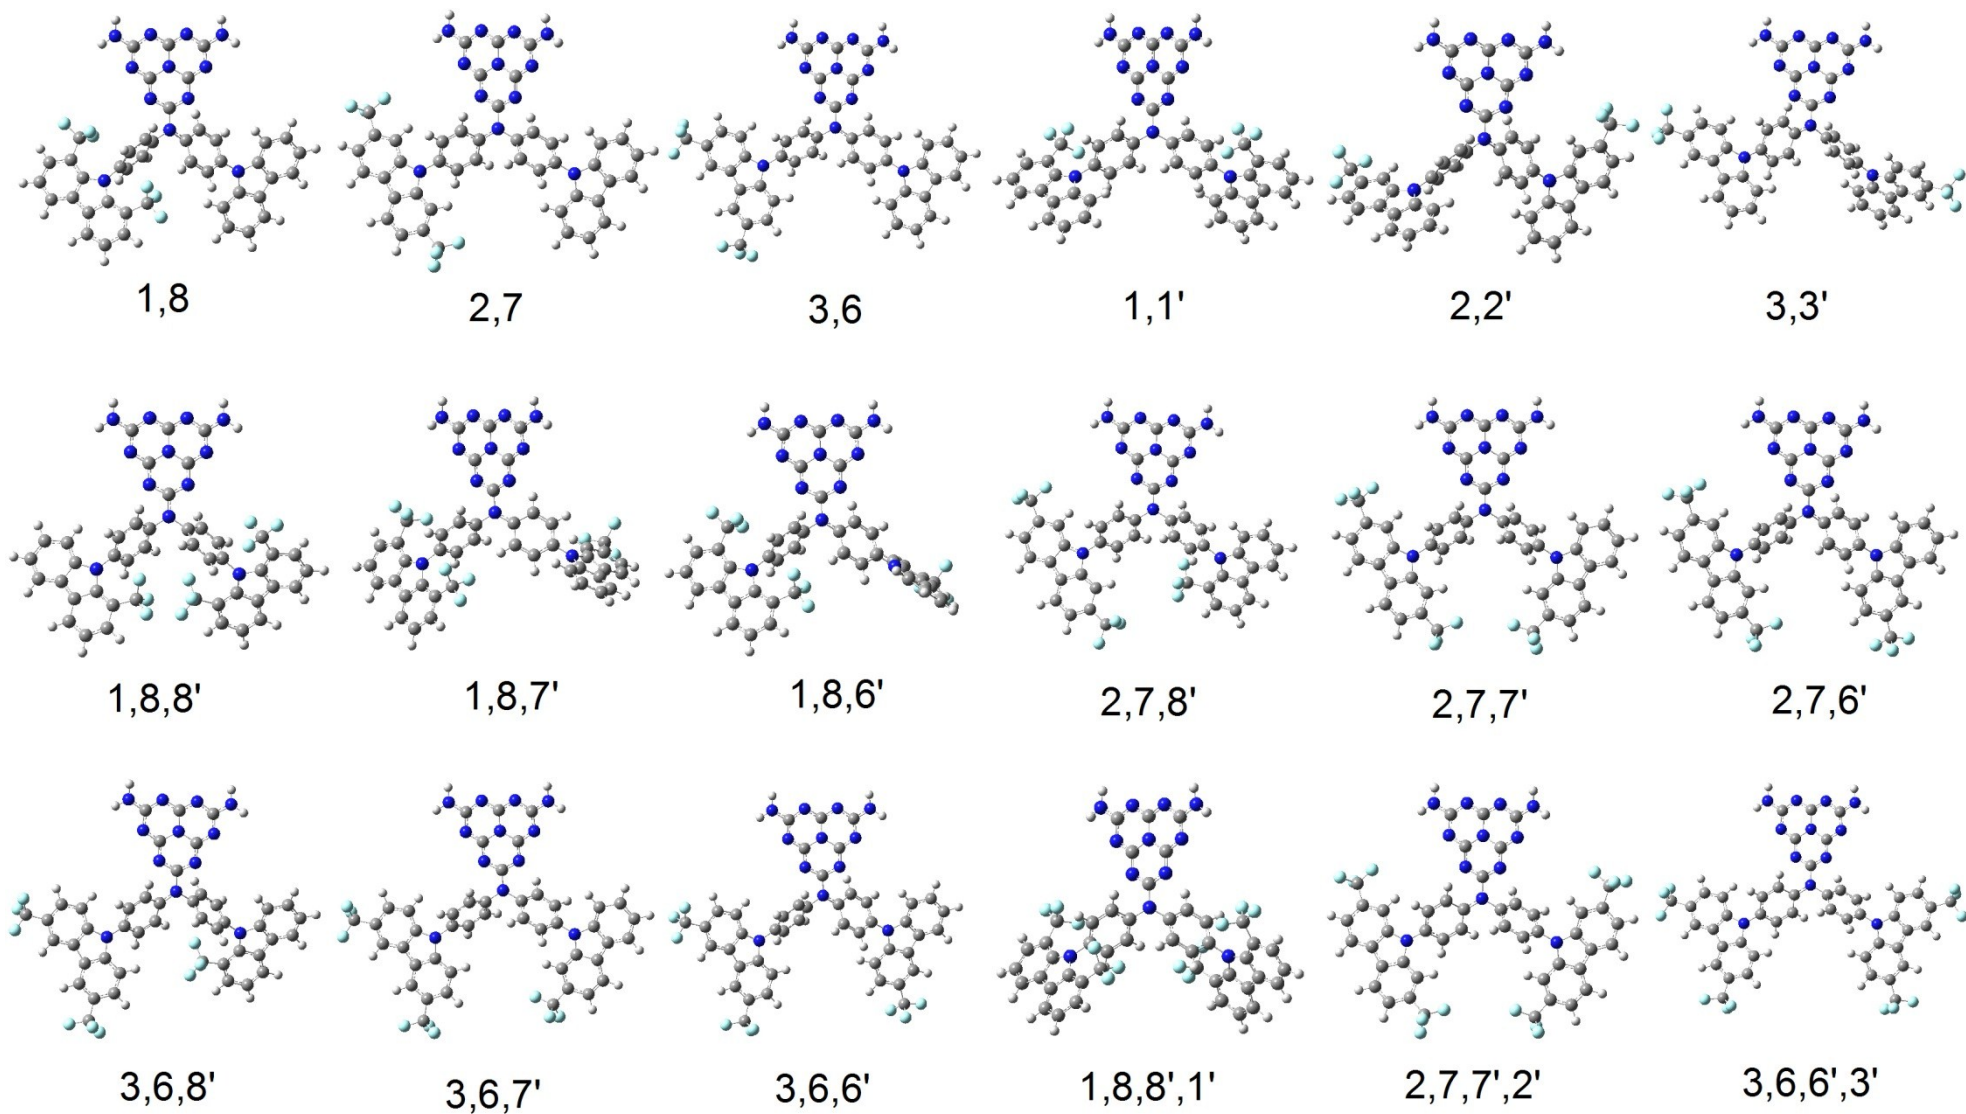

Figure SI8 The optimized structures for the trifluoromethyl substituted DTT-DPA-CBZ in excited states ( $T_1$ ) at B3LYP/6-31G\* level of theory



Table S11 The triplet energies  $E_T$ , FMO energies ( $E_{\text{HOMO}}$  and  $E_{\text{LUMO}}$ ),  $\Delta E_{\text{L-H}}$ , IP, EA and reorganization energies of substituted DTT-DPA-CBZ (unit: eV)

| Molecule    | Substituent                                       | $E_T$ | $\Delta E_{\text{L-H}}$ | $E_{\text{HOMO}}$ | $E_{\text{LUMO}}$ | IP   | EA    | $\lambda_h$ | $\lambda_e$ |
|-------------|---------------------------------------------------|-------|-------------------------|-------------------|-------------------|------|-------|-------------|-------------|
| DTT-DPA-CBZ | H                                                 | 2.92  | 3.78                    | -5.22             | -1.44             |      |       | 0.23        | 0.41        |
| D1          | CH <sub>3</sub>                                   | 3.45  | 3.73                    | -5.15             | -1.42             | 6.09 | -0.19 | 0.22        | 0.86        |
| D2          | C <sub>2</sub> H <sub>5</sub>                     | 3.44  | 3.73                    | -5.16             | -1.43             | 6.09 | -0.21 | 0.22        | 0.85        |
| D3          | C <sub>3</sub> H <sub>7</sub>                     | 3.45  | 3.74                    | -5.16             | -1.42             | 6.08 | -0.21 | 0.22        | 0.87        |
| D4          | C <sub>4</sub> H <sub>9</sub>                     | 3.45  | 3.73                    | -5.15             | -1.42             | 6.07 | -0.21 | 0.21        | 0.88        |
| D5          | C(CH <sub>3</sub> )HC <sub>2</sub> H <sub>5</sub> | 3.45  | 3.73                    | -5.15             | -1.42             | 6.06 | -0.21 | 0.21        | 0.85        |
| D6          | C(CH <sub>3</sub> ) <sub>3</sub>                  | 3.43  | 3.71                    | -5.13             | -1.42             | 6.04 | -0.22 | 0.21        | 0.85        |
| D7          | OC <sub>6</sub> H <sub>5</sub>                    | 3.32  | 3.72                    | -5.20             | -1.48             | 6.04 | -0.20 | 0.37        | 0.68        |
| D8          | OH                                                | 3.32  | 3.6                     | -5.03             | -1.43             | 6.02 | -0.38 | 0.19        | 0.45        |
| D9          | OCH <sub>3</sub>                                  | 3.42  | 3.46                    | -4.92             | -1.46             | 5.88 | -0.22 | 0.22        | 0.89        |
| D10         | N(CH <sub>3</sub> ) <sub>2</sub>                  | 3.03  | 2.94                    | -4.27             | -1.33             | 5.18 | -0.08 | 0.31        | 0.95        |
| D11         | NH <sub>2</sub>                                   | 3.12  | 3.15                    | -4.52             | -1.37             | 5.51 | -0.13 | 0.40        | 0.92        |

Table SI2 The triplet energies  $E_T$ , FMO energies ( $E_{\text{HOMO}}$  and  $E_{\text{LUMO}}$ ),  $\Delta E_{\text{L-H}}$ , IP, EA and reorganization energies of substituted DTT-DPA-CBZ (unit: eV)

| Molecule    | Substituent       | $E_T$ | $\Delta E_{\text{L-H}}$ | $E_{\text{HOMO}}$ | $E_{\text{LUMO}}$ | IP   | EA    | $\lambda_h$ | $\lambda_e$ |
|-------------|-------------------|-------|-------------------------|-------------------|-------------------|------|-------|-------------|-------------|
| DTT-DPA-CBZ | H                 | 2.92  | 3.78                    | -5.22             | -1.44             |      |       | 0.23        | 0.41        |
| W1          | F                 | 3.55  | 4.00                    | -5.53             | -1.53             | 6.48 | -0.33 | 0.31        | 0.83        |
| W2          | Cl                | 3.56  | 4.10                    | -5.68             | -1.58             | 6.60 | -0.48 | 0.32        | 0.72        |
| W3          | Br                | 3.57  | 4.08                    | -5.65             | -1.57             | 6.57 | -0.48 | 0.34        | 0.71        |
| W4          | CF <sub>3</sub>   | 3.03  | 4.15                    | -5.76             | -1.61             | 6.69 | -0.68 | 0.37        | 0.38        |
| W5          | CCl <sub>3</sub>  | 3.04  | 4.19                    | -5.99             | -1.80             | 6.86 | -0.78 | 0.35        | 0.60        |
| W6          | CN                | 3.02  | 3.94                    | -6.13             | -2.19             | 7.04 | -1.26 | 0.39        | 0.17        |
| W7          | COOH              | 2.95  | 3.75                    | -5.74             | -1.99             | 6.67 | -1.04 | 0.44        | 0.26        |
| W8          | NO <sub>2</sub>   | 2.88  | 3.29                    | -6.13             | -2.84             | 7.06 | -1.88 | 0.50        | 0.25        |
| W9          | COH               | 2.66  | 3.45                    | -5.72             | -2.27             | 6.65 | -1.31 | 0.36        | 0.19        |
| W10         | COCl              | 2.56  | 3.31                    | -6.02             | -2.71             | 6.93 | -1.80 | 0.42        | 0.26        |
| W11         | COCH <sub>3</sub> | 2.59  | 3.58                    | -5.54             | -1.96             | 6.45 | -1.04 | 0.33        | 0.20        |

Table SI3 The calculated total energies and crystal cell parameters of 1,8,7' -substituted DTT-DPA-CBZ in different space groups

| Space group                  | Total energy | Length a(Å) | Length b(Å) | Length c(Å) | Angle alpha(deg) | Angle beta(deg) | Angle gamma(deg) |
|------------------------------|--------------|-------------|-------------|-------------|------------------|-----------------|------------------|
| <i>C2</i>                    | 132.544051   | 23.07       | 6.98        | 26.52       | 90               | 76.69           | 90               |
| <i>C2/c</i>                  | 137.7817158  | 22.70       | 17.39       | 23.39       | 90               | 115.80          | 90               |
| <i>Cc</i>                    | 132.7195567  | 6.92        | 50.83       | 11.57       | 90               | 99.34           | 90               |
| <i>P1</i>                    | 135.4483765  | 15.55       | 10.63       | 8.93        | 72.36            | 79.43           | 47.84            |
| <i>P<math>\bar{1}</math></i> | 129.0283163  | 12.55       | 11.57       | 27.10       | 70.63            | 69.23           | 32.92            |
| <i>P2<sub>1</sub></i>        | 132.1734216  | 21.98       | 6.88        | 16.21       | 90               | 122.36          | 90               |
| <i>P2<sub>1</sub>/C</i>      | 133.7690718  | 13.25       | 11.49       | 26.78       | 90               | 83.21           | 90               |
| <i>Pbca</i>                  | 136.383321   | 22.71       | 19.62       | 17.99       | 90               | 90              | 90               |
| <i>Pbcn</i>                  | 138.1975572  | 8.63        | 19.18       | 51.69       | 90               | 90              | 90               |
| <i>Pna2<sub>1</sub></i>      | 134.1406131  | 27.06       | 22.13       | 6.97        | 90               | 90              | 90               |
